# Supplementary material
Source: PubMed Central journal article supplement (PMC3939847)

## Web Material

Temporal Relationship Between Uric Acid Concentration and Risk of Diabetes in a Community-based Study Population

Stephen P. Juraschek, Mara McAdams-Demarco, Edgar R. Miller, Allan C. Gelber, Janet W. Maynard, James S. Pankow, Hunter Young, Josef Coresh, and Elizabeth Selvin

**Web Table 1. Adjusted\* hazard ratios (and 95% confidence intervals) for incident diabetes by quartile of uric acid concentration in strata of fasting glucose, insulin, or HOMA-IR level at baseline**

| Visit-based Diabetes (9 Years of Follow-up) | Quartile of Uric Acid Concentration (mg/dL) |                   |                   |                   | P-trend† |
|---------------------------------------------|---------------------------------------------|-------------------|-------------------|-------------------|----------|
|                                             | 0.5–4.9                                     | 5.0–5.8           | 5.9–6.9           | 7.0–15.9          |          |
| Fasting glucose (mg/dL)                     |                                             |                   |                   |                   |          |
| <100                                        | 1.00 (reference)                            | 0.65 (0.44, 0.97) | 0.87 (0.60, 1.27) | 0.94 (0.61, 1.46) | 0.79     |
| 100–125                                     | 1.00 (reference)                            | 1.10 (0.86, 1.41) | 1.43 (1.13, 1.82) | 1.54 (1.20, 1.98) | <0.001   |
| Fasting insulin (μU/mL)                     |                                             |                   |                   |                   |          |
| <15                                         | 1.00 (reference)                            | 0.93 (0.72, 1.21) | 1.42 (1.11, 1.82) | 1.63 (1.24, 2.15) | <0.001   |
| ≥15                                         | 1.00 (reference)                            | 1.12 (0.77, 1.63) | 1.20 (0.84, 1.71) | 1.33 (0.93, 1.91) | 0.07     |
| HOMA-IR                                     |                                             |                   |                   |                   |          |
| <2.6                                        | 1.00 (reference)                            | 0.99 (0.71, 1.38) | 1.40 (1.01, 1.95) | 2.02 (1.40, 2.92) | <0.001   |
| ≥2.6                                        | 1.00 (reference)                            | 0.95 (0.73, 1.25) | 1.17 (0.91, 1.51) | 1.24 (0.95, 1.62) | 0.02     |

Abbreviation: HOMA-IR, homeostasis model assessment insulin resistance index.

\*Adjusted for age, sex, race/study center, low density lipoprotein cholesterol, high density lipoprotein cholesterol, triglycerides, body mass index, estimated glomerular filtration rate, hypertension, parental family history of diabetes, education, smoking status, alcohol use, and diuretic use.

†P-trend was calculated using the median of each quartile as an ordinal variable.

**Web Table 2. Visit 4 uric acid concentration or within-person change in uric acid concentration by duration of diabetes excluding participants using gout medications (n = 1,449)**

|                                                          | Mean Uric Acid Concentration (mg/dL) (95% CI)                  |                      |                      |
|----------------------------------------------------------|----------------------------------------------------------------|----------------------|----------------------|
|                                                          | Model 1                                                        | Model 2              | Model 3              |
| <i>Category of diabetes duration</i>                     |                                                                |                      |                      |
| 0.0–4.3 years                                            | Ref = 0                                                        | Ref = 0              | Ref = 0              |
| 4.4–7.2 years                                            | -0.28 (-0.49, -0.07)                                           | -0.14 (-0.33, 0.04)  | -0.07 (-0.25, 0.11)  |
| 7.3–9.0 years                                            | -0.59 (-0.79, -0.39)                                           | -0.38 (-0.56, -0.21) | -0.17 (-0.35, 0.01)  |
| 9.1–65.0 years                                           | -0.56 (-0.78, -0.33)                                           | -0.52 (-0.72, -0.32) | -0.29 (-0.49, -0.08) |
| <i>P</i> -trend                                          | <0.001                                                         | <0.001               | 0.005                |
| <i>Uric acid concentration per 5 years with diabetes</i> | -0.16 (-0.22, -0.10)                                           | -0.15 (-0.21, -0.10) | -0.10 (-0.15, -0.05) |
|                                                          | Mean 9-year Within-person Change in Uric Acid (mg/dL) (95% CI) |                      |                      |
|                                                          | Model 1                                                        | Model 2              | Model 3              |
| <i>Category of diabetes duration</i>                     |                                                                |                      |                      |
| 0.0–4.3 years                                            | Ref = 0                                                        | Ref = 0              | Ref = 0              |
| 4.4–7.2 years                                            | -0.45 (-0.65, -0.24)                                           | -0.39 (-0.59, -0.19) | -0.33 (-0.52, -0.13) |
| 7.3–9.0 years                                            | -0.75 (-0.95, -0.55)                                           | -0.67 (-0.86, -0.48) | -0.46 (-0.66, -0.27) |
| 9.1–65.0 years                                           | -0.15 (-0.37, 0.07)                                            | -0.18 (-0.40, 0.04)  | 0.05 (-0.17, 0.28)   |
| <i>P</i> -trend                                          | 0.04                                                           | 0.02                 | 0.90                 |
| <i>Mean 9-year change per 5 years with diabetes</i>      | -0.01 (-0.02, 0.01)                                            | -0.01 (-0.02, 0.00)  | -0.03 (-0.09, 0.03)  |

Note: This analysis was conducted in visit 4 participants with a diagnosis of diabetes by visit 4.

Abbreviation: CI, confidence interval.

Model 1: Results adjusted for age, sex, race/study center.

Model 2: Results adjusted for Model 1 + low density lipoprotein cholesterol, high density lipoprotein cholesterol, triglycerides, body mass index, estimated glomerular filtration rate, hypertension, parental family history of diabetes, education, smoking status, alcohol use, diuretic use.

Model 3: Results adjusted for Model 2 + fasting glucose + fasting insulin.

**Web Table 3. Visit 4 uric acid concentration or within-person change in uric acid concentration by duration of diabetes excluding participants using insulin-based medications (n = 1,333)**

| Visit 4 Uric Acid                                         | Mean Uric Acid Concentration (mg/dL) (95% CI)                  |                      |                      |
|-----------------------------------------------------------|----------------------------------------------------------------|----------------------|----------------------|
|                                                           | Model 1                                                        | Model 2              | Model 3              |
| <i>Category of diabetes duration</i>                      |                                                                |                      |                      |
| 0.0–4.3 years                                             | Ref = 0                                                        | Ref = 0              | Ref = 0              |
| 4.4–7.2 years                                             | -0.30 (-0.51, -0.10)                                           | -0.16 (-0.35, 0.02)  | -0.08 (-0.26, 0.11)  |
| 7.3–9.0 years                                             | -0.59 (-0.79, -0.39)                                           | -0.39 (-0.57, -0.20) | -0.13 (-0.32, 0.05)  |
| 9.1–65.0 years                                            | -0.63 (-0.89, -0.36)                                           | -0.47 (-0.71, -0.22) | -0.16 (-0.41, 0.08)  |
| <i>P-trend</i>                                            | <0.001                                                         | <0.001               | 0.13                 |
| <i>Uric acid concentration per 5 year with diabetes</i>   | -0.21 (-0.28, -0.13)                                           | -0.17 (-0.23, -0.10) | -0.09 (-0.15, -0.02) |
| Within-person Change in Uric Acid (Visit 4 minus Visit 1) | Mean 9-year Within-person Change in Uric Acid (mg/dL) (95% CI) |                      |                      |
|                                                           | Model 1                                                        | Model 1              | Model 1              |
| <i>Category of diabetes duration</i>                      |                                                                |                      |                      |
| 0.0–4.3 years                                             | Ref = 0                                                        | Ref = 0              | Ref = 0              |
| 4.4–7.2 years                                             | -0.43 (-0.64, -0.23)                                           | -0.39 (-0.60, -0.18) | -0.33 (-0.53, -0.13) |
| 7.3–9.0 years                                             | -0.71 (-0.91, -0.51)                                           | -0.64 (-0.85, -0.44) | -0.43 (-0.64, -0.22) |
| 9.1–65.0 years                                            | -0.23 (-0.50, 0.04)                                            | -0.20 (-0.46, 0.07)  | 0.05 (-0.22, 0.32)   |
| <i>P-trend</i>                                            | <0.001                                                         | 0.002                | 0.45                 |
| <i>Uric acid concentration per 5 year with diabetes</i>   | -0.15 (-0.22, -0.07)                                           | -0.14 (-0.22, -0.06) | -0.07 (-0.15, 0.00)  |

Note: This analysis was conducted in visit 4 participants with a diagnosis of diabetes by visit 4.

Abbreviation: CI, confidence interval.

Model 1: Results adjusted for age, sex, race/study center.

Model 2: Results adjusted for Model 1 + low density lipoprotein cholesterol, high density lipoprotein cholesterol, triglycerides, body mass index, estimated glomerular filtration rate, hypertension, parental family history of diabetes, education, smoking status, alcohol use, diuretic use.

Model 3: Results adjusted for Model 2 + fasting glucose + fasting insulin.

**Web Table 4. Visit 4 uric acid or within person change in uric acid concentration by duration of diabetes excluding participants using any diabetes medication, N = 860**

|                                                                       | Mean Uric Acid Concentration (mg/dL) (95% CI) |                      |                      |
|-----------------------------------------------------------------------|-----------------------------------------------|----------------------|----------------------|
|                                                                       | Model 1                                       | Model 2              | Model 3              |
| <i>Category of diabetes duration</i>                                  |                                               |                      |                      |
| 0.0–4.3 years                                                         | Ref = 0                                       | Ref = 0              | Ref = 0              |
| 4.4–7.2 years                                                         | -0.27 (-0.50, -0.05)                          | -0.14 (-0.34, 0.07)  | -0.07 (-0.27, 0.14)  |
| 7.3–9.0 years                                                         | -0.56 (-0.81, -0.31)                          | -0.33 (-0.57, -0.10) | -0.12 (-0.36, 0.12)  |
| 9.1–65.0 years                                                        | -0.77 (-1.26, -0.27)                          | -0.40 (-0.86, 0.06)  | -0.32 (-0.77, 0.14)  |
| <i>P</i> -trend                                                       | <0.001                                        | 0.004                | 0.14                 |
| <i>Uric acid concentration per 5 year with diabetes</i>               | -0.33 (-0.45, -0.21)                          | -0.19 (-0.31, -0.08) | -0.13 (-0.25, -0.02) |
| <b>Mean 9-year Within-person Change in Uric Acid (mg/dL) (95% CI)</b> |                                               |                      |                      |
|                                                                       | Model 1                                       | Model 2              | Model 3              |
| <i>Category of diabetes duration</i>                                  |                                               |                      |                      |
| 0.0–4.3 years                                                         | Ref = 0                                       | Ref = 0              | Ref = 0              |
| 4.4–7.2 years                                                         | -0.34 (-0.57, -0.11)                          | -0.27 (-0.50, -0.05) | -0.22 (-0.44, 0.00)  |
| 7.3–9.0 years                                                         | -0.63 (-0.88, -0.37)                          | -0.55 (-0.80, -0.29) | -0.34 (-0.60, -0.07) |
| 9.1–65.0 years                                                        | -0.29 (-0.80, 0.21)                           | -0.22 (-0.73, 0.29)  | -0.17 (-0.67, 0.33)  |
| <i>P</i> -trend                                                       | <0.001                                        | 0.001                | 0.03                 |
| <i>Mean 9-year change per 5 years with diabetes</i>                   | -0.27 (-0.39, -0.15)                          | -0.24 (-0.37, -0.12) | -0.19 (-0.31, -0.06) |

Note: This analysis was conducted in visit 4 participants with a diagnosis of diabetes by visit 4.

Abbreviation: CI, confidence interval.

Model 1: Results adjusted for age, sex, race/study center.

Model 2: Results adjusted for Model 1 + low density lipoprotein cholesterol, high density lipoprotein cholesterol, triglycerides, body mass index, estimated glomerular filtration rate, hypertension, parental family history of diabetes, education, smoking status, alcohol use, diuretic use.

Model 3: Results adjusted for Model 2 + fasting glucose + fasting insulin.

**Web Table 5. Within-person change in uric acid concentration (mg/dL) in participants with diabetes at both visit 1 and visit 4 compared to participants without diabetes at both visit 1 and visit 4 (*n* = 1,510)**

|         | <b>β (95% CI)</b>    | <b>P Value</b> |
|---------|----------------------|----------------|
| Model 1 | -0.46 (-0.56, -0.35) | <0.001         |
| Model 2 | -0.51 (-0.61, -0.40) | <0.001         |
| Model 3 | -0.27 (-0.42, -0.12) | 0.001          |

Abbreviation: CI, confidence interval.

Model 1: Results adjusted for age, sex, race/study center.

Model 2: Results adjusted for Model 1 + low density lipoprotein cholesterol, high density lipoprotein cholesterol, triglycerides, body mass index, estimated glomerular filtration rate, hypertension, parental family history of diabetes, education, smoking status, alcohol use, diuretic use.

Model 3: Results adjusted for Model 2 + fasting glucose + fasting insulin.

### Web Figure 1. Study Design

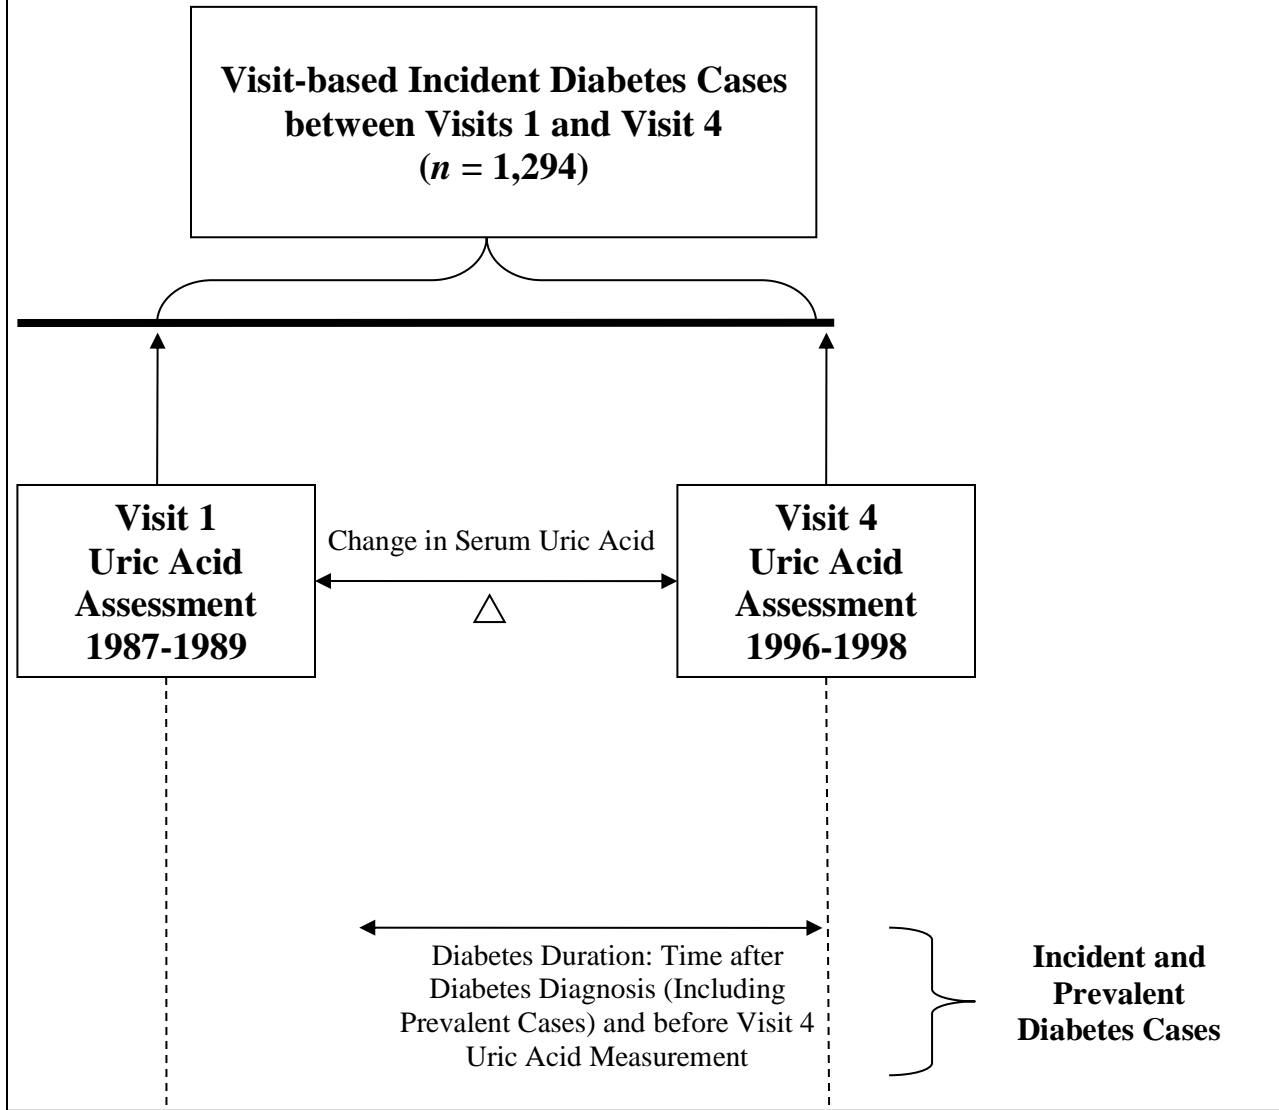

Supplement: supp_kwt320_kwt320supp.pdf [file supp_kwt320_kwt320supp.pdf]
